# Supplementary material for: Design and Synthesis of C-1 Methoxycarbonyl Derivative of Narciclasine and Its Biological Activity
Source: MDPI journal article supplement (doi:10.3390/molecules27123809), 2022-06-14

# Design and synthesis of C-1 derivatives of narciclasine and their biological activities

Lihi Habaz,<sup>\*a</sup> Korey Bedard,<sup>a</sup> Mitchell Smith,<sup>b</sup> Liqin Du,<sup>b</sup> Alexander Kornienko,<sup>\*b</sup> Tomas Hudlicky<sup>a</sup>

<sup>a</sup>Department of Chemistry, Brock University, 1812 Sir Isaac Brock Way, St. Catharines, ON L2S 3A1, Canada  
*lhabaz@brocku.ca*

<sup>b</sup>Department of Chemistry and Biochemistry, Texas State University, San Marcos, TX 78666, USA  
*a\_k76@txstate.edu*

Spectral data provided for all novel compounds.

## TABLE OF CONTENTS

|                          |    |
|--------------------------|----|
| Compound <b>21</b> ..... | 2  |
| Compound <b>22</b> ..... | 3  |
| Compound <b>23</b> ..... | 4  |
| Compound <b>24</b> ..... | 5  |
| Compound <b>27</b> ..... | 6  |
| Compound <b>28</b> ..... | 7  |
| Compound <b>29</b> ..... | 8  |
| Compound <b>30</b> ..... | 9  |
| Compound <b>10</b> ..... | 10 |

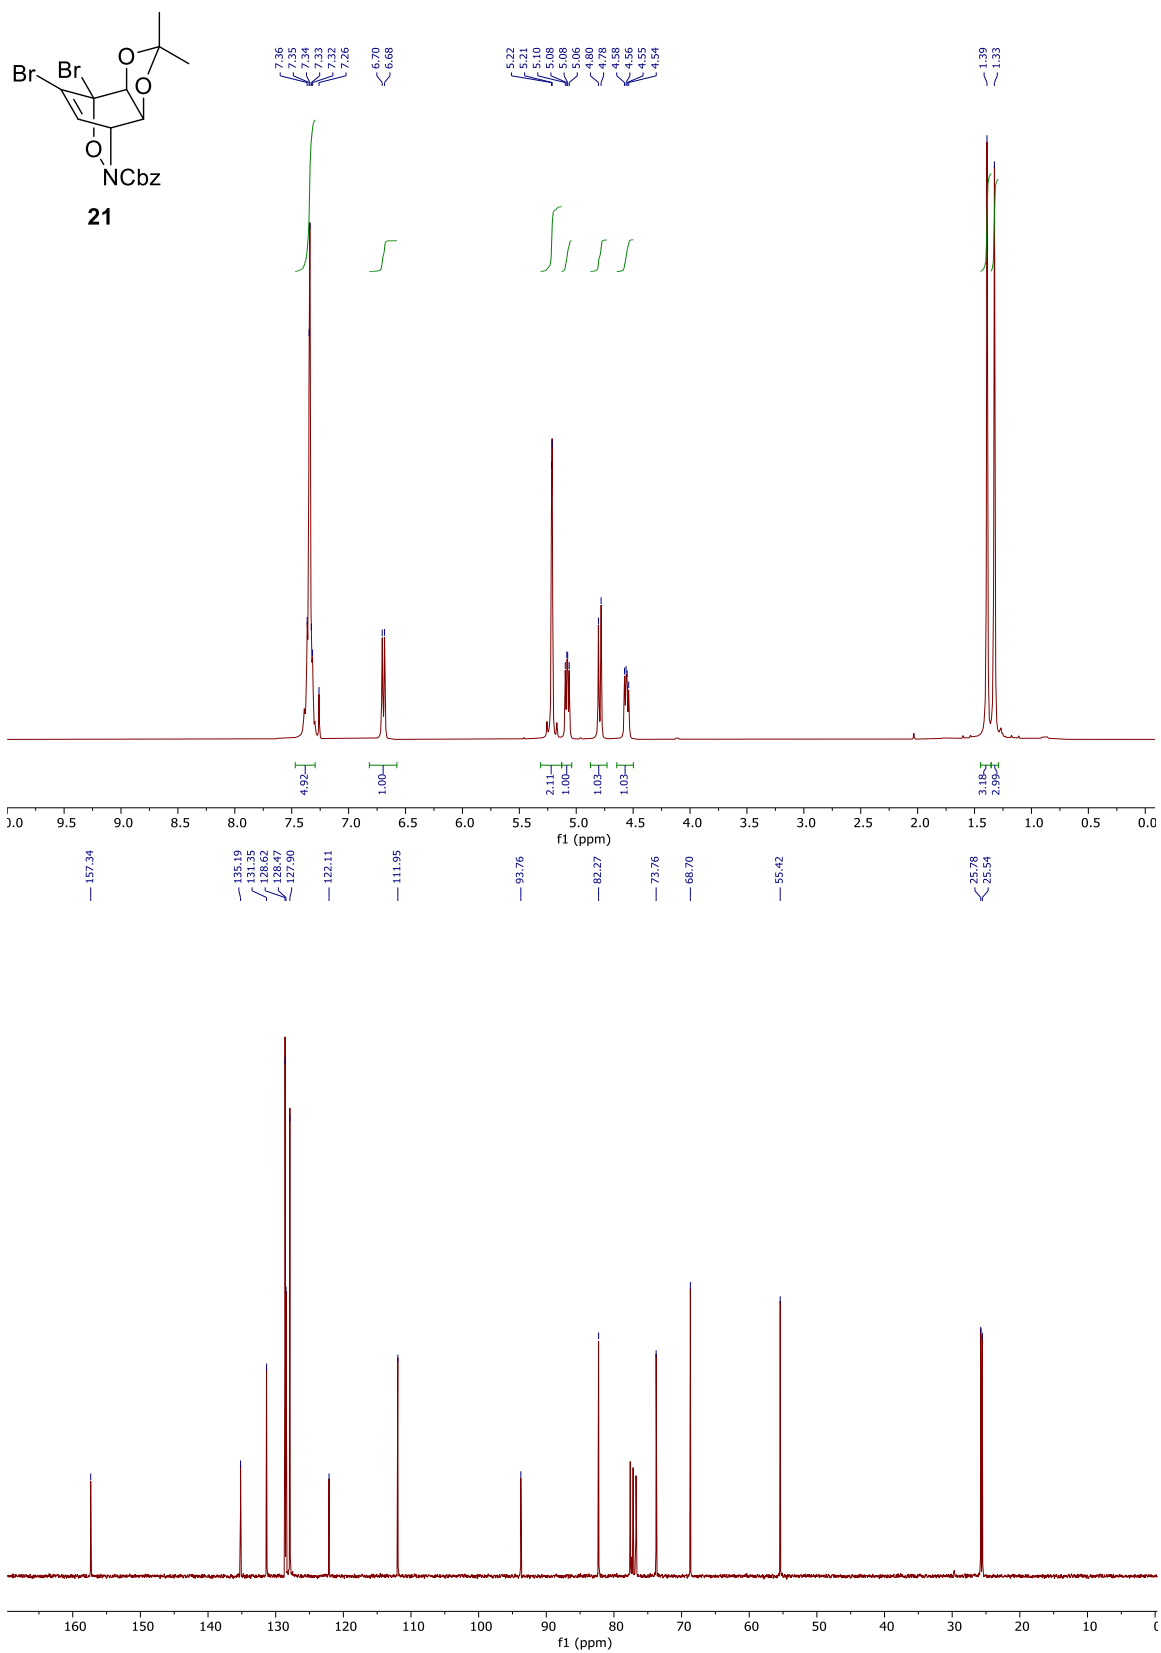

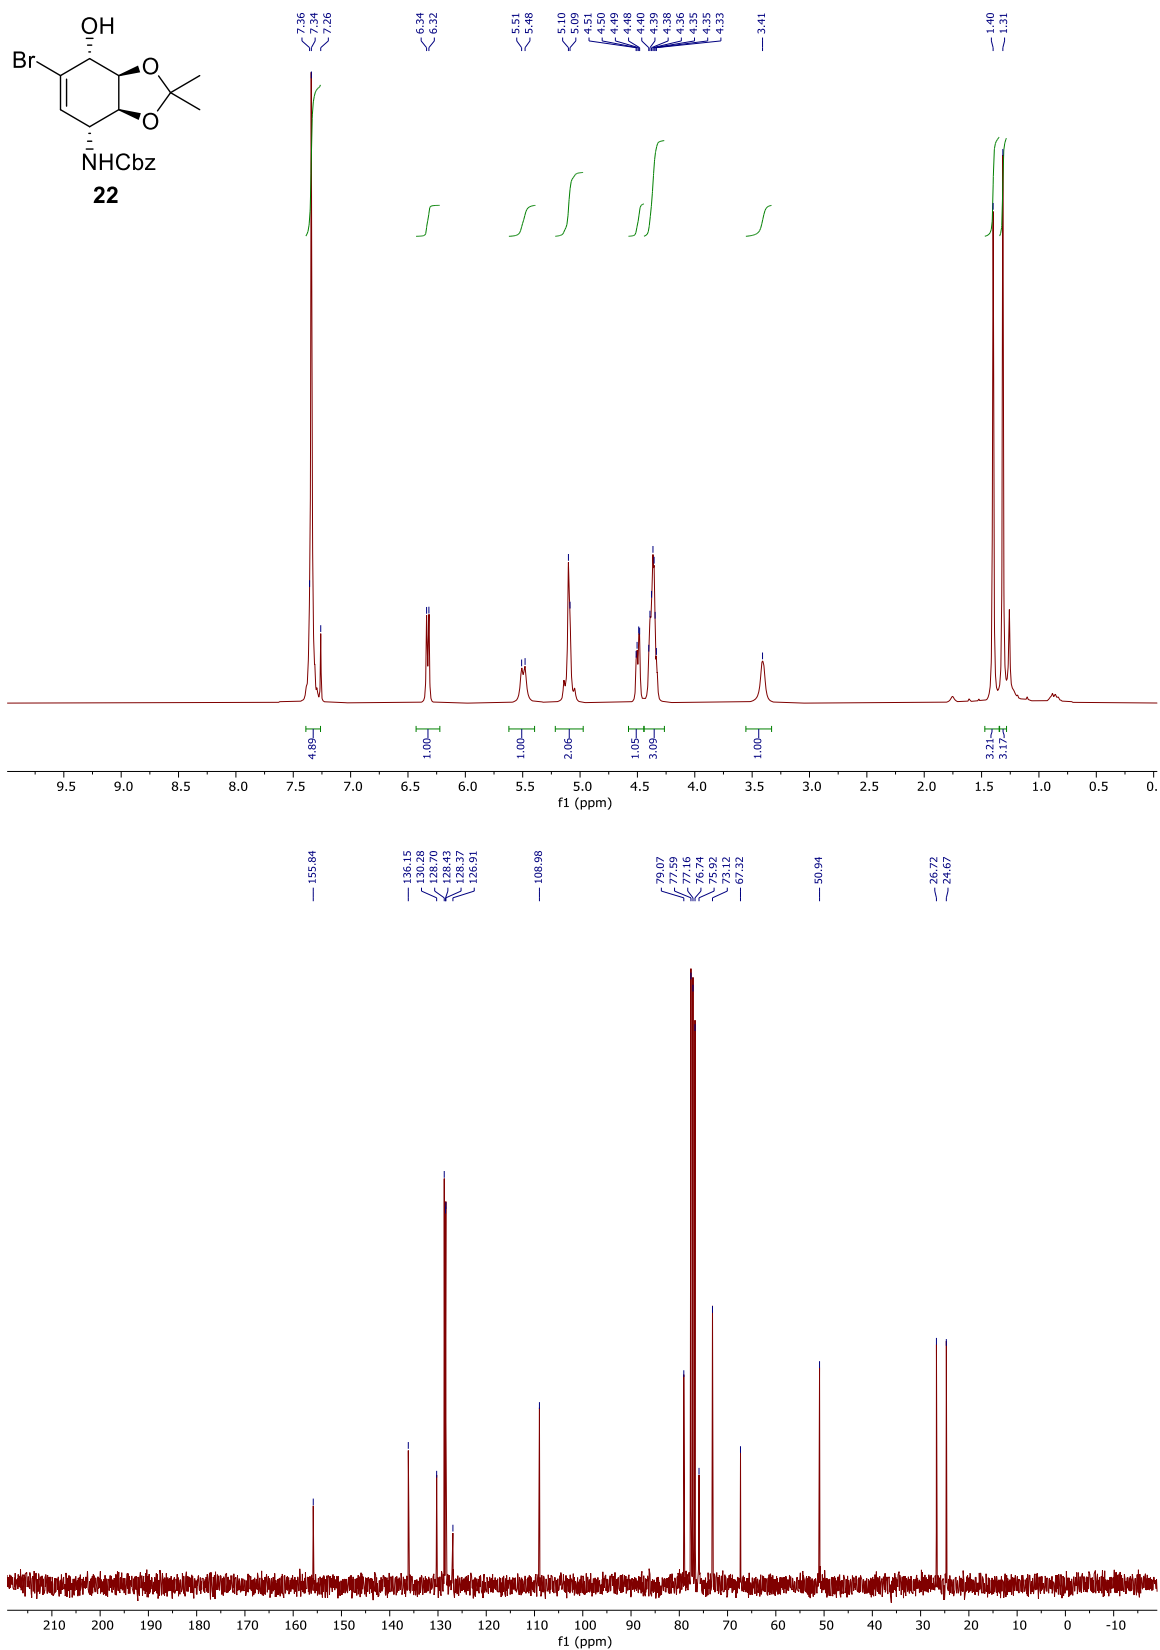

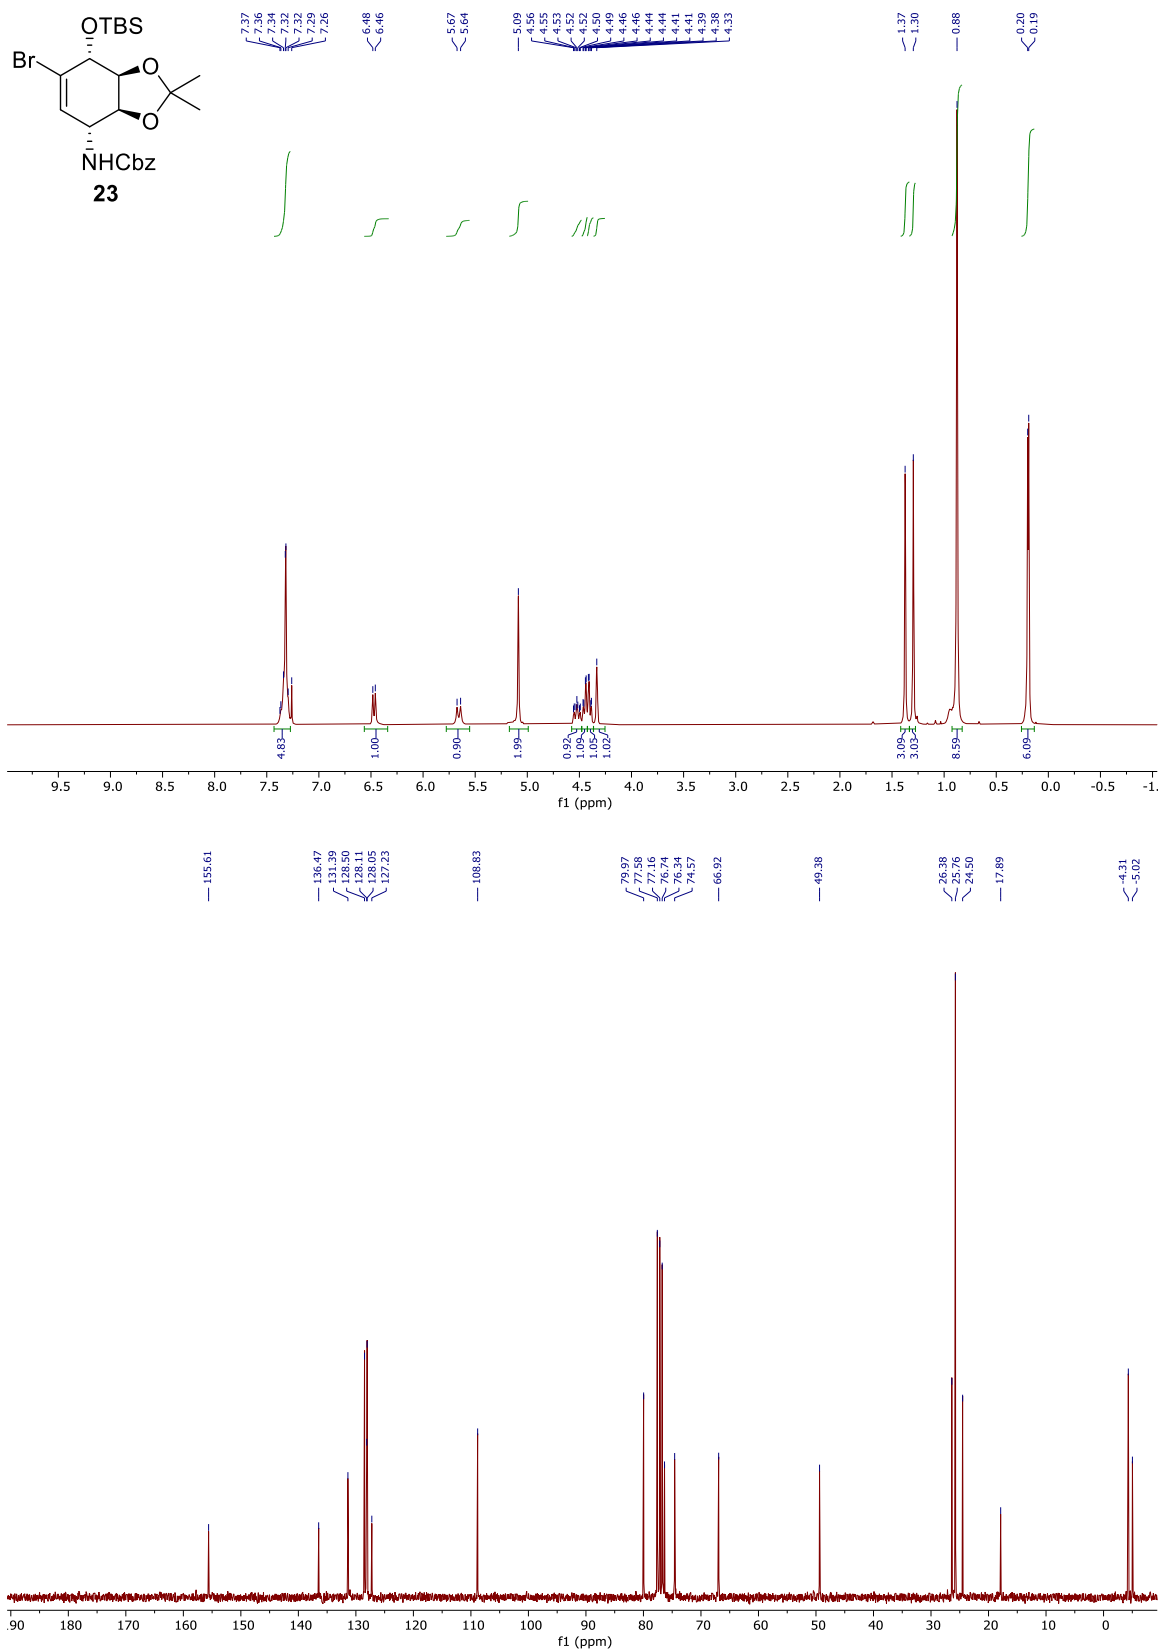

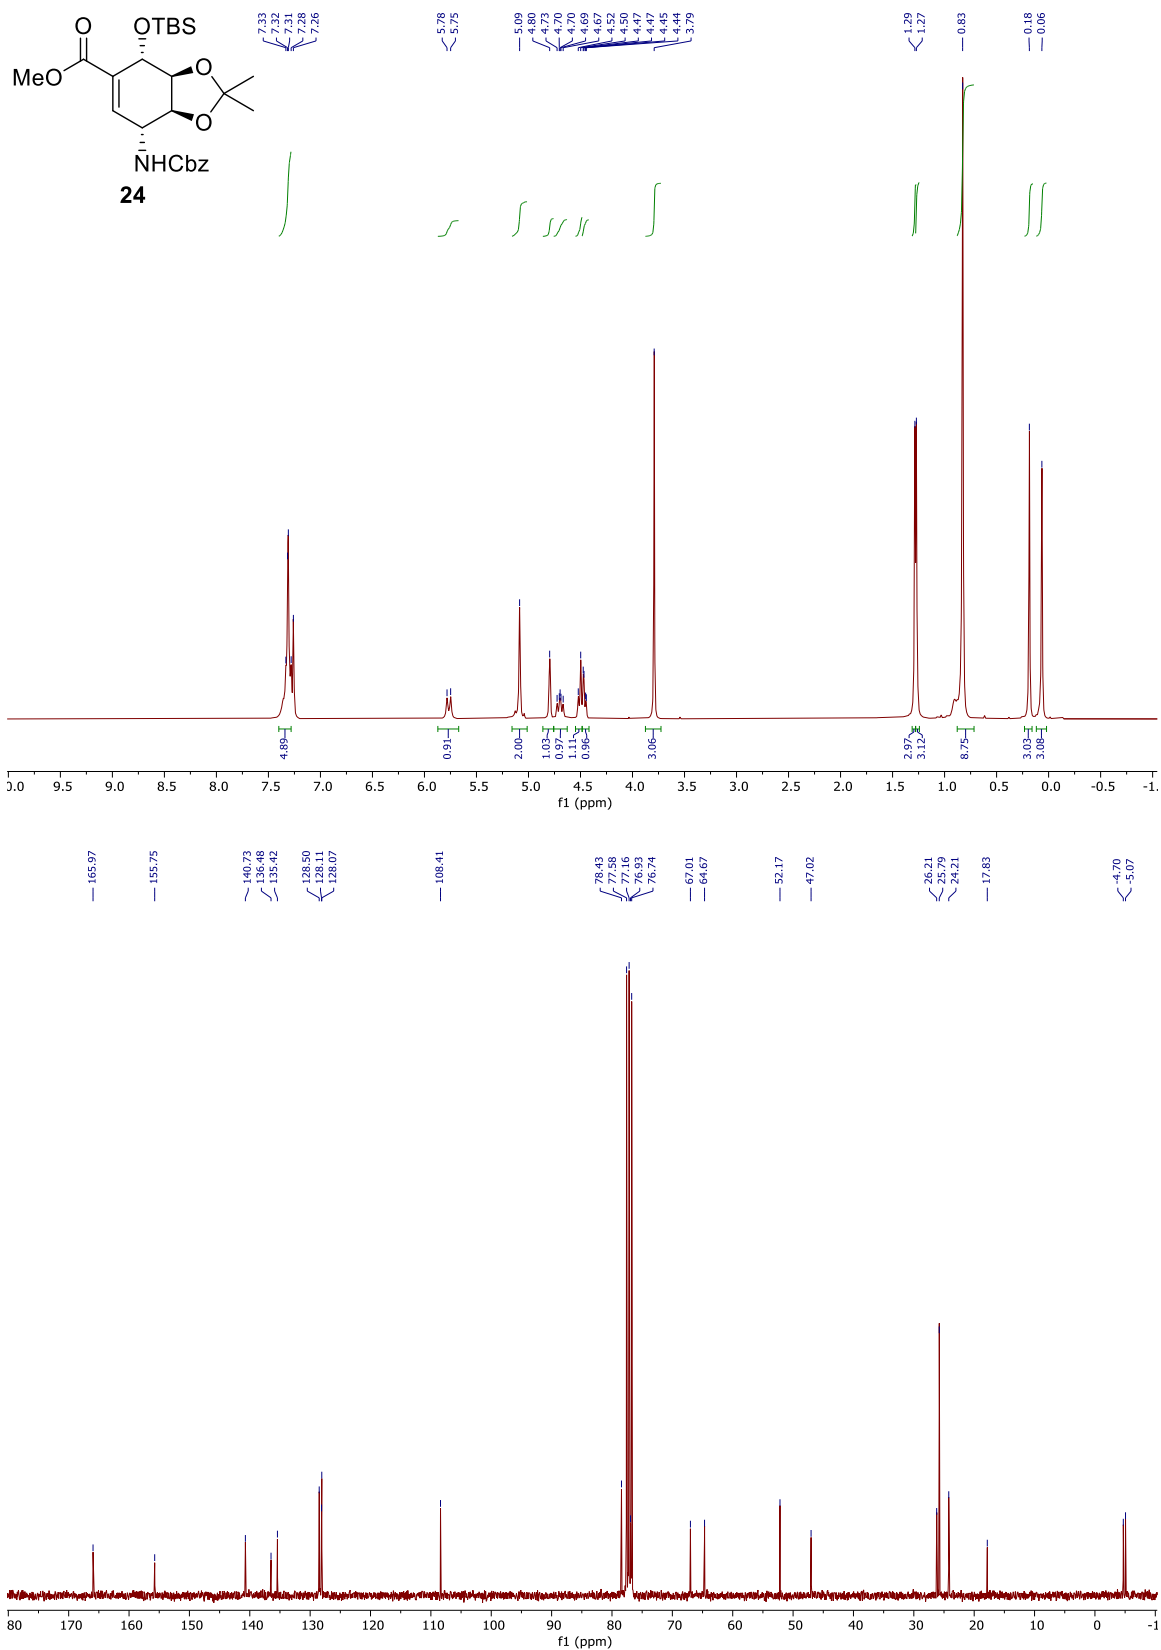

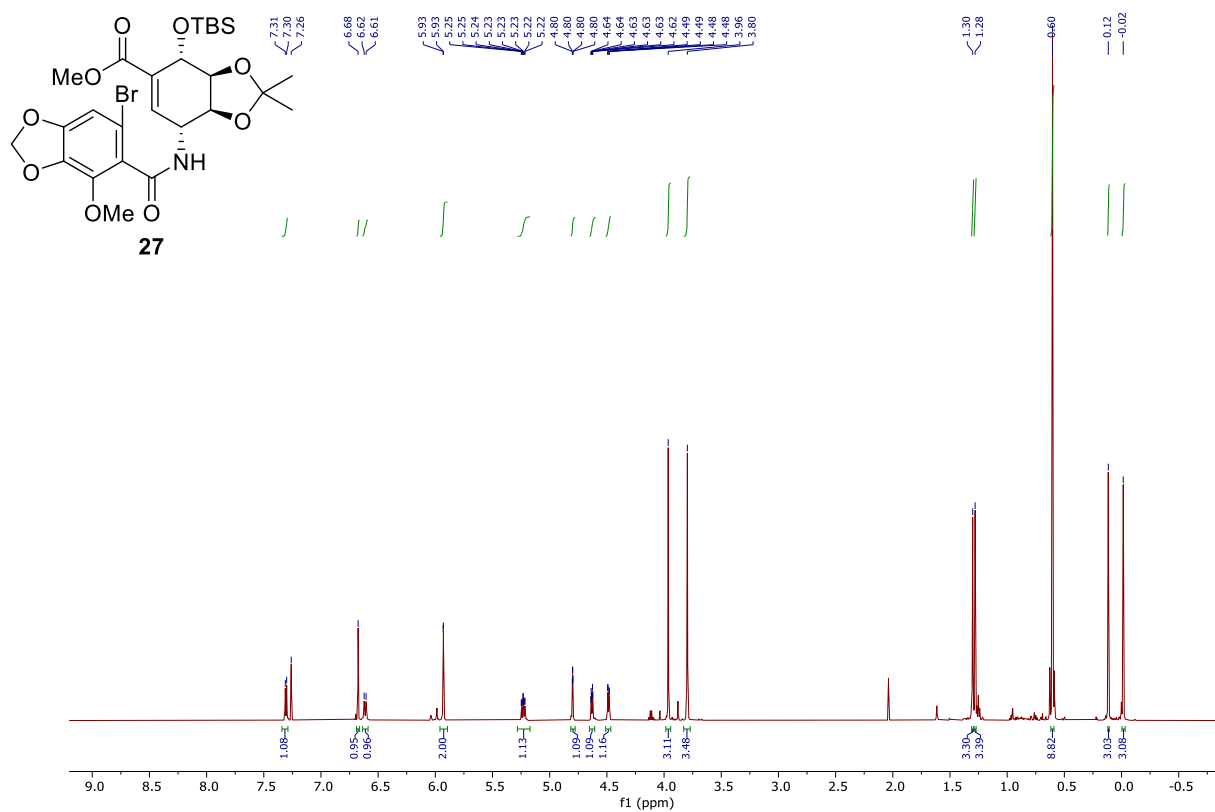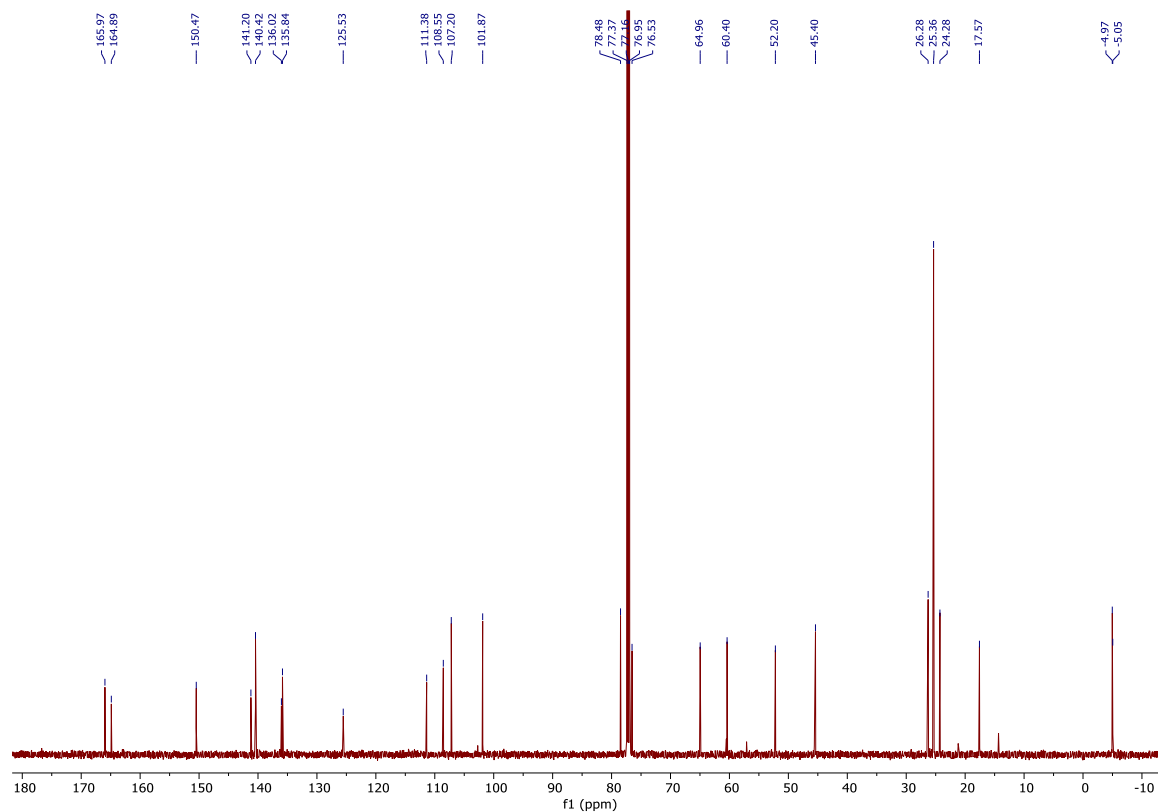

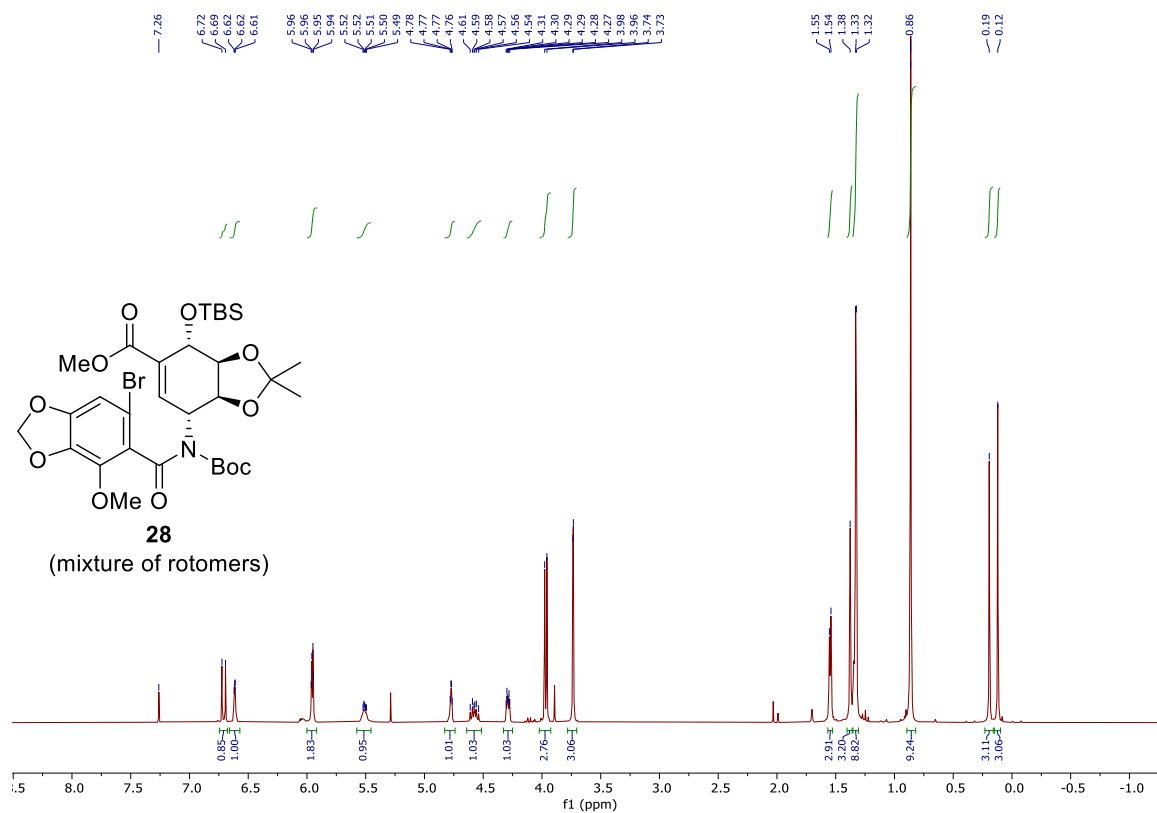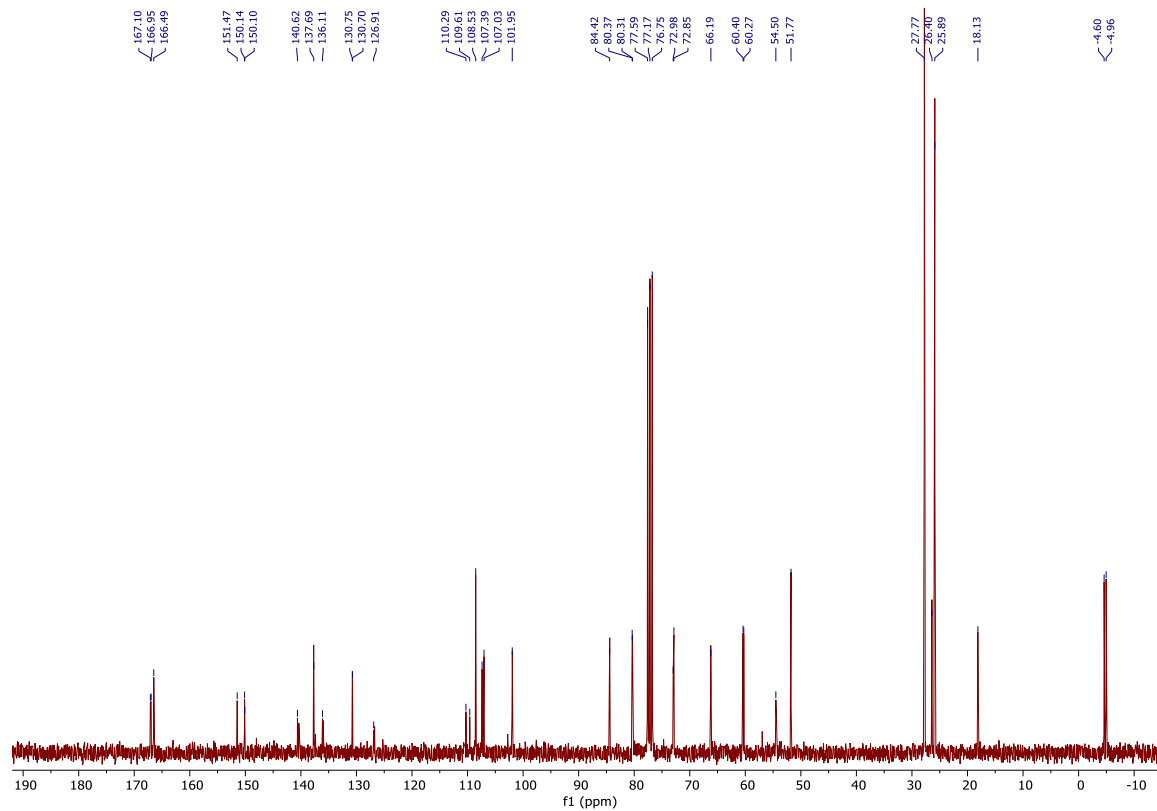

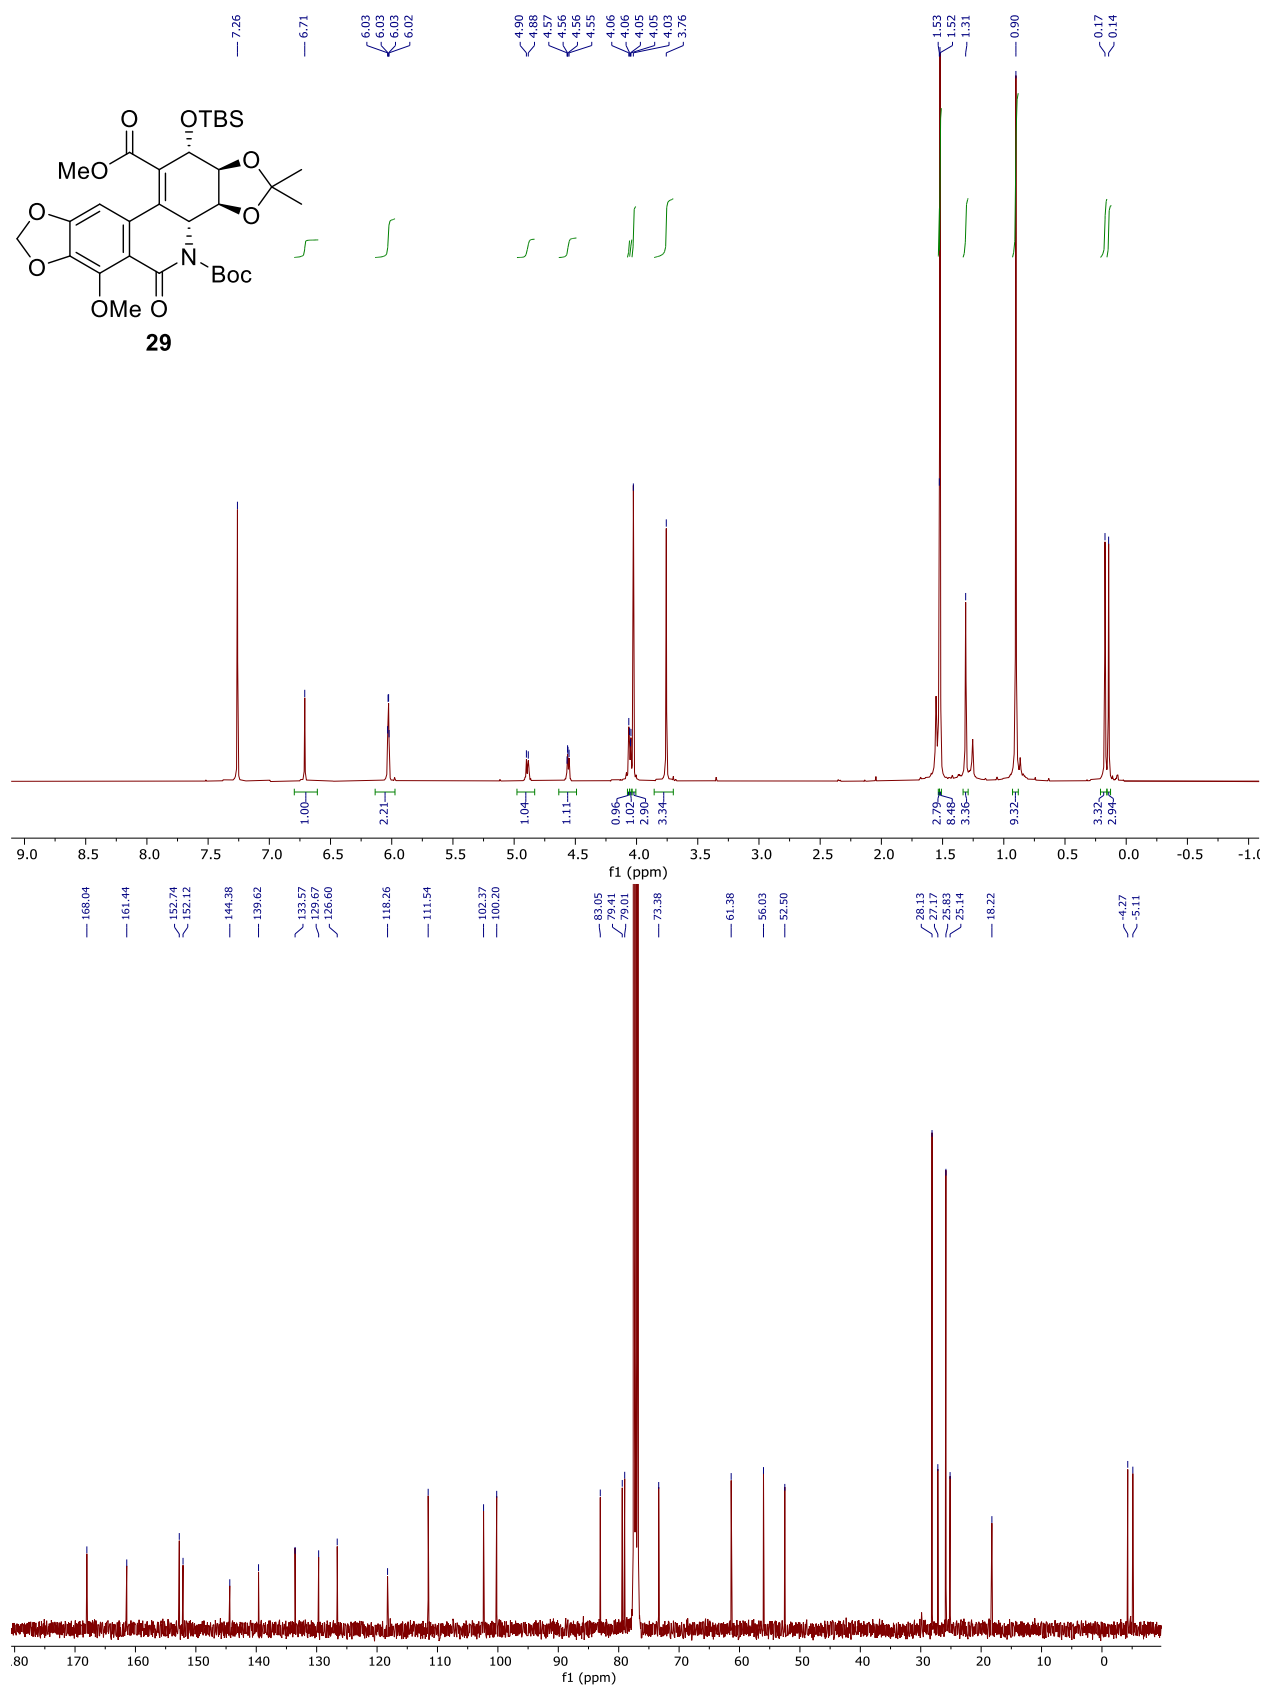



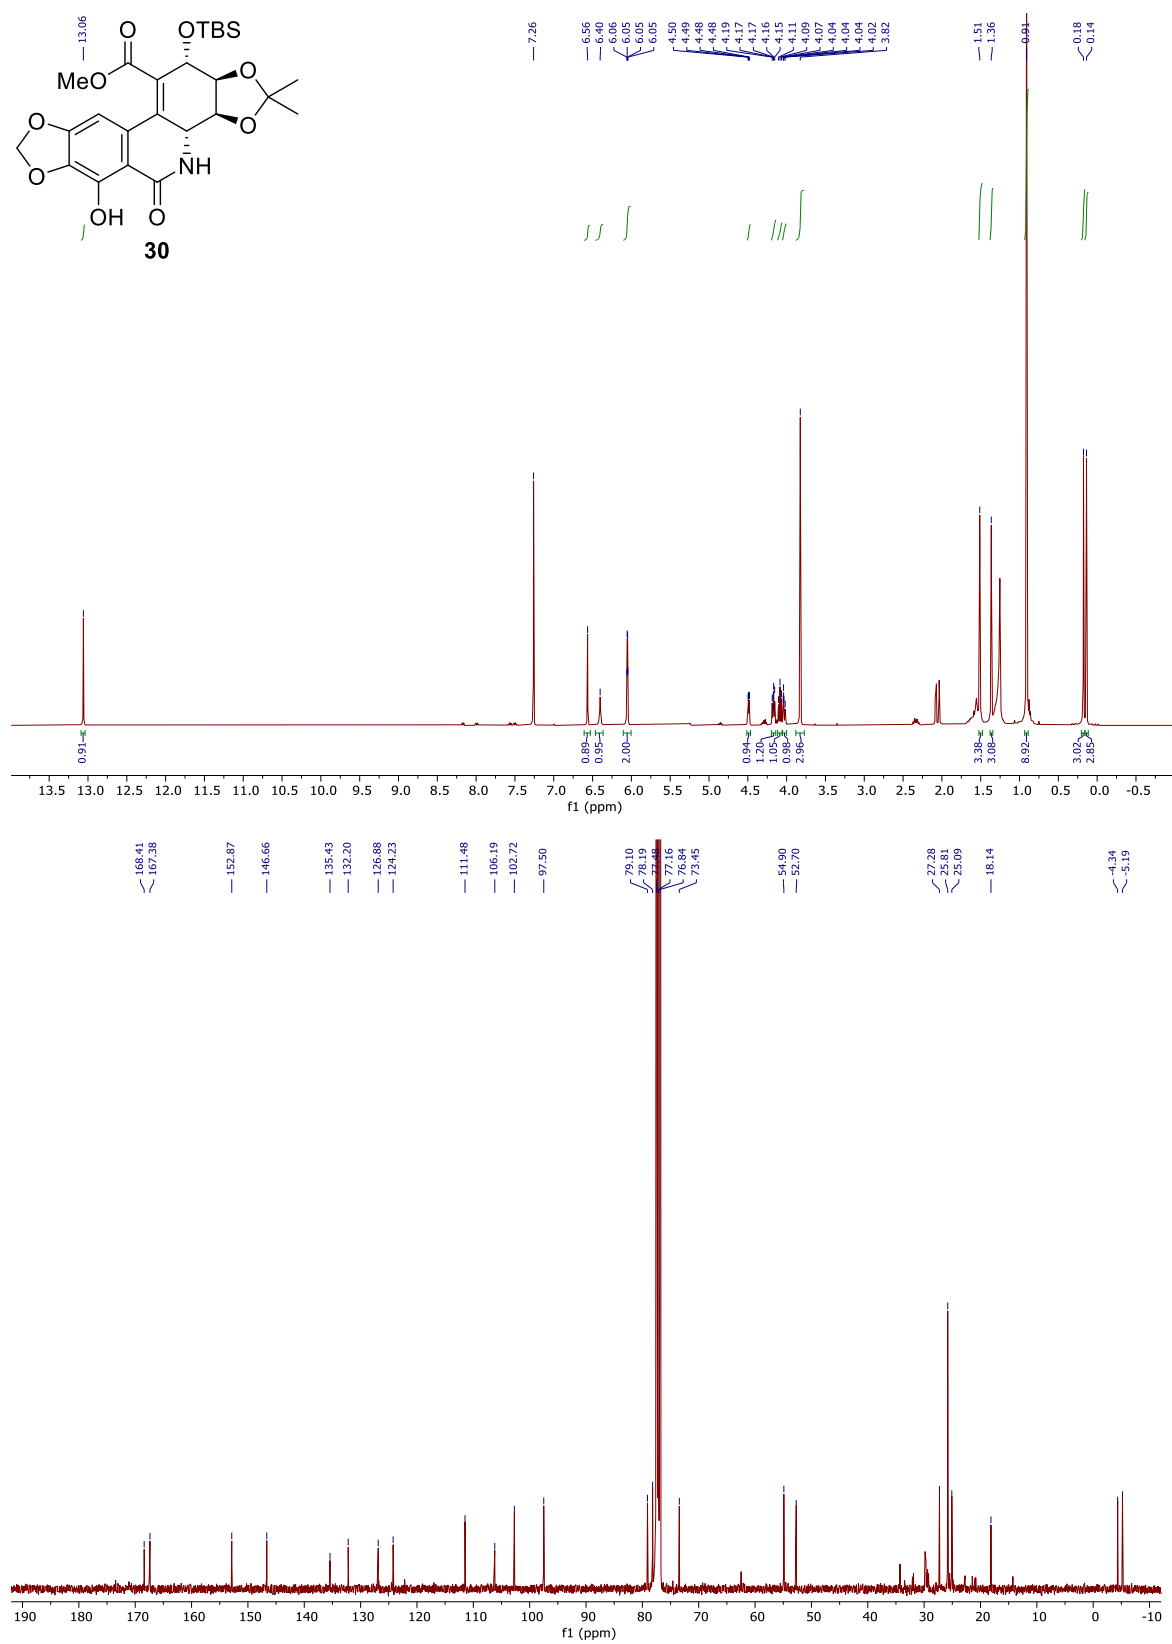

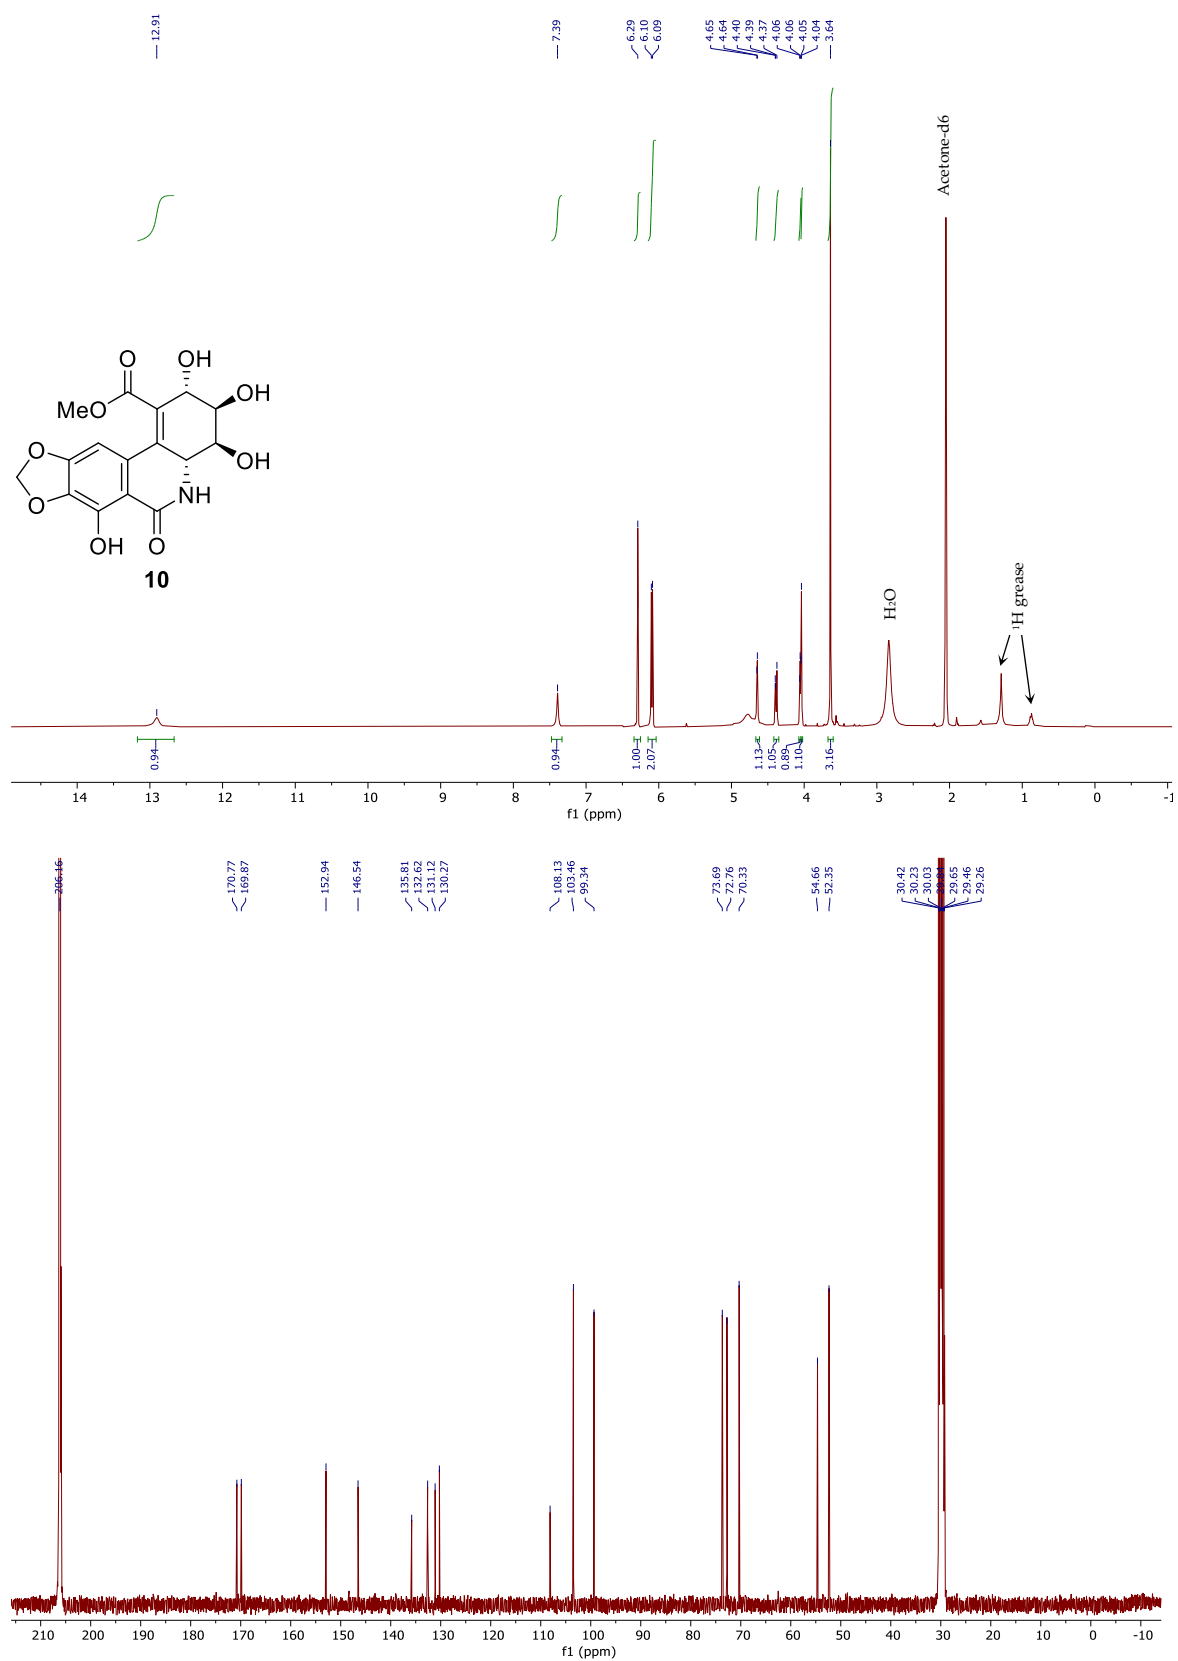

Supplement: s1 [file s1]
